# Supplementary material for: Effects of γ irradiation on bis(2-ethylhexyl)phosphoric acid supported by macroporous silica-based polymeric resins
Source: publisher site journal article supplement (doi:10.1515/ract-2017-2758), 2017-10-08
Supplement: Supplementary file 1 [file ract-2017-2758_suppl.docx]

Effect of gamma irradiation on bis(2-ethylhexyl)phosphoric acid supported by macroporous silica-based polymeric resins

Qiding Shua, Afshin Khayambashia, Xinpeng Wangb, Xiaolong Wanga, Lei Fengc, Yuezhou Weia, b,[[1]](#footnote-1)*

aSchool of Nuclear Science and Engineering, School of Mechanical Engineering, Shanghai Jiao Tong University,

800 Dong Chuan Road, Shanghai 200240, China;

bCollege of Resource and Metallurgy, Guangxi University, 100 Daxue East Road，Nanning 530004, China;

cInstrumental Analysis Centre, Shanghai Jiao Tong University, 800 Dong Chuan Road, Shanghai 200240, China.





Figure S1 The adsorption kinetics of Gd(III) onto irradiated HDEHP/SiO2-P resins under dry condition, [Gd(III)] = 10 mmol·L-1, pH = 2, phase ratio: 0.1 g/5 mL.





Figure S2 The adsorption kinetics of Gd(III) onto irradiated HDEHP/SiO2-P resins in 0.1 M HNO3 solutions, [Gd(III)] = 10 mmol·L-1, pH = 2, phase ratio: 0.1 g/5 mL.





Figure S3 The adsorption kinetics of Gd(III) onto irradiated HDEHP/SiO2-P resins in 3 M HNO3 solution, [Gd(III)] = 10 mmol·L-1, pH = 2, phase ratio: 0.1 g/5 mL.


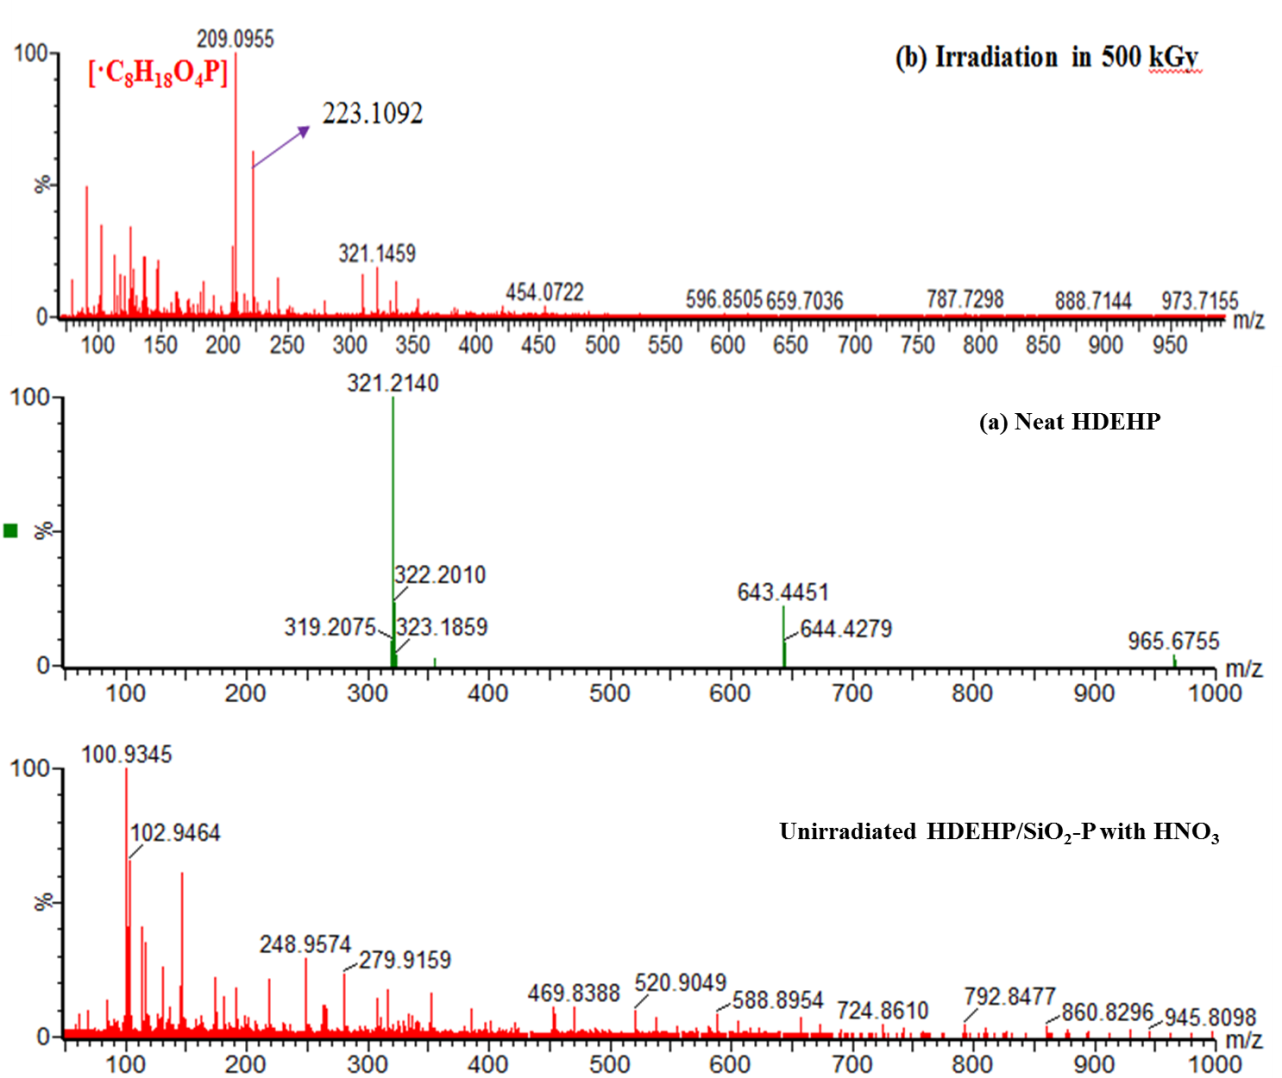


Figure S4 HRMS spectrum of neat HDEHP, the irradiated filter liquor, and leakage from unirradiated HDEHP/SiO2-P contacted with HNO3 solutions.

1. * Correspondence author (e-mail:yzwei@sjtu.edu.cn) [↑](#footnote-ref-1)
